1 **Alcohol use associated alterations in the circulating metabolite profile in the general**  
2 **population and in individuals with major depressive disorder**

3

4 Olli Kärkkäinen<sup>a,\*</sup>, Tommi Tolmunen<sup>b,c</sup>, Petri Kivimäki<sup>b,d</sup>, Karoliina Kurkinen<sup>b</sup>, Toni Ali-  
5 Sisto<sup>b</sup>, Pekka Mäntyselkä<sup>e,f</sup>, Minna Valkonen-Korhonen<sup>b,g</sup>, Heli Koivumaa-Honkanen<sup>b</sup>, Kirsi  
6 Honkalampi<sup>h</sup>, Anu Ruusunen<sup>e,g,i</sup>, Vidya Velagapudi<sup>j</sup>, Soili M. Lehto<sup>k,l,m</sup>

7

8 <sup>a</sup> School of Pharmacy, University of Eastern Finland, P.O. Box 1627, 70211, Kuopio, Finland

9 <sup>b</sup> Institute of Clinical Medicine/Psychiatry, University of Eastern Finland, P.O. Box 1627,  
10 70211, Kuopio, Finland

11 <sup>c</sup> Department of Adolescent Psychiatry, Kuopio University Hospital, P.O. Box 100. 70029  
12 KYS, Finland

13 <sup>d</sup> City of Helsinki, Vuosaari Outpatient Psychiatry Clinic. Postal address: P.O. Box 6250, FI-  
14 00099 City of Helsinki, Helsinki, Finland

15 <sup>e</sup> Clinical Research and Trials Centre, Kuopio University Hospital, P.O. Box 100. 70029  
16 KYS, Finland

17 <sup>f</sup> Institute of Public Health and Clinical Nutrition, University of Eastern Finland, P.O. Box  
18 1627, 70211, Kuopio, Finland

19 <sup>g</sup> Department of Psychiatry, Kuopio University Hospital, Kuopio, Finland

20 <sup>h</sup> School of Educational Sciences and Psychology, University of Eastern Finland, P.O. Box  
21 111, 80101 Joensuu, Finland

22 <sup>i</sup> Deakin University, IMPACT - the Institute for Mental and Physical Health and Clinical  
23 Translation, Food & Mood Centre, IMPACT Strategic Research Centre, School of Medicine,  
24 P.O. Box 281, Geelong, VIC 3220, Australia

25 <sup>j</sup> Metabolomics Unit, Institute for Molecular Medicine Finland FIMM, P.O. Box 20, FI-  
26 00014 University of Helsinki, Finland

**NOTE: This preprint reports new research that has not been certified by peer review and should not be used to guide clinical practice.**

27 <sup>k</sup> Institute of Clinical Medicine, University of Oslo, Oslo, Norway

28 <sup>l</sup> R&D Department, Division of Mental Health Services, Akershus University Hospital,  
29 Lørenskog, Norway

30 <sup>m</sup> Psychiatry, University of Helsinki and Helsinki University Hospital, P.O. Box 20, FI-00014  
31 Helsinki, Finland

32

33 \* Correspondence: [olli.karkkainen@uef.fi](mailto:olli.karkkainen@uef.fi), School of Pharmacy, University of Eastern  
34 Finland, P.O. Box 1627, 70211, Kuopio, Finland

35

36 Running title: Alcohol, metabolites, and depression

37

38 Keywords: Depression; Alcoholism; Metabolomics; Hippurate; 5-hydroxyindoleacetic acid

39 ABSTRACT

40 Our aim was to evaluate whether alcohol use is associated with changes in the circulating  
41 metabolite profile similar to those present in persons with depression. If so, these findings  
42 could partially explain the link between alcohol use and depression. We applied a targeted  
43 liquid chromatography mass spectrometry method to evaluate correlates between  
44 concentrations of 86 circulating metabolites and self-reported alcohol use in a cohort of the  
45 non-depressed general population (GP) (n = 247) and a cohort of individuals with major  
46 depressive disorder (MDD) (n = 99). Alcohol use was associated with alterations in  
47 circulating concentrations of metabolites in both cohorts. Our main finding was that self-  
48 reported alcohol use was negatively correlated with serum concentrations of hippuric acid in  
49 the GP cohort. In the GP cohort, consumption of six or more doses per week was associated  
50 with low hippuric acid concentrations, similar to those observed in the MDD cohort, but in  
51 these individuals it was regardless of their level of alcohol use. Reduced serum  
52 concentrations of hippuric acid suggest that already moderate alcohol use is associated with  
53 depression-like changes in the serum levels of metabolites associated with gut microbiota and  
54 liver function; this may be one possible molecular level link between alcohol use and  
55 depression.

## 56 **Introduction**

57 Heavy alcohol use and lifetime occurrence of alcohol use disorder have been associated with  
58 an increased incidence of a major depressive disorder (MDD) (Grant et al., 2015; McHugh &  
59 Weiss, 2019; Odlaug et al., 2016). It has been estimated that around one in six of persons  
60 with MDD is suffering from a current alcohol use disorder, and that around every third  
61 person with MDD has had a lifetime occurrence of alcohol use disorder (DeVido & Weiss,  
62 2012; Sullivan et al., 2005; Swendsen et al., 1998). However, the relationship between  
63 moderate alcohol use and the incidence of MDD remains controversial: some studies show  
64 possible small increase in the incidence of MDD (Odlaug et al., 2016), whereas others have  
65 not been able to detect any associations (García-Esquinas et al., 2018) or even found evidence  
66 for a reduced incidence of MDD (Bellos et al., 2016). Light alcohol use has not been  
67 associated with an increased risk of MDD, and light drinkers are commonly used as controls  
68 in these studies (Bellos et al., 2016; García-Esquinas et al., 2018; Grant et al., 2015; Odlaug  
69 et al., 2016).

70

71 One possible mediating effect between alcohol use and MDD are changes in the activity of  
72 many metabolic processes. Heavy alcohol use has been associated with an altered  
73 metabolome (for a review see Voutilainen and Kärkkäinen, 2019). For example, increased  
74 levels of glutamate, citrate, alanine, phenylalanine, tyrosine, glucose, docosahexaenoate, 2-  
75 piperidone and phosphatidylcholine diacyls, and decreased levels of glutamine, serotonin,  
76 asparagine, hydroxysphingomyelins, gamma-aminobutyric acid (GABA) and  
77 phosphatidylcholine acyl-alkyls have been associated with heavy alcohol use (Heikkinen et  
78 al., 2019; Jaremek et al., 2013; Kärkkäinen, Farokhnia, et al., 2021; Kärkkäinen, Kokla, et al.,  
79 2021; Lehtikoinen et al., 2018; Würtz et al., 2016). In a prospective study with an over 30

80 years' follow-up, changes in the circulating metabolome, e.g., decreased levels of serotonin  
81 and asparagine, preceded the diagnosis of diseases related to alcohol use (Kärkkäinen et al.,  
82 2020). Similarly, also MDD has been associated with alterations in circulating levels of  
83 metabolites – some of which have also been linked to alcohol use (e.g., glutamate,  
84 phenylalanine, citrate and serotonin; for a review see Gadad et al., 2018). This evidence, in  
85 addition to the observed overlap in the incidences of MDD and alcohol use, imply that there  
86 may well be some shared underlying pathology related to the disturbances in metabolic  
87 processes.

88

89 We have now investigated whether alcohol use would be associated with similar changes in  
90 the circulating metabolite profiles irrespective of the presence of depression by measuring the  
91 associations between serum metabolite concentrations and self-reported alcohol use in two  
92 cohorts: a non-depressed general population (GP) cohort and a cohort of individuals with  
93 MDD.

## 94 **Material and methods**

### 95 *Study cohorts*

96 Two cohorts were used: 1) a general population cohort of non-depressed individuals (GP  
97 cohort), and 2) patients with major depressive disorder (MDD cohort) (Ali-Sisto et al., 2016;  
98 Kraav et al., 2019). Both cohorts represented the same population, as Kuopio University  
99 Hospital from where the MDD cohort was recruited serves the municipality area of  
100 Lapinlahti from where the GP cohort was recruited. The Ethics Committee of Hospital  
101 District of Northern Savo approved both studies. Participants provided written informed  
102 consent before entering the studies.

103

104 The non-depressed GP cohort was from a population-based follow-up study consisting of 480  
105 individuals living in the municipality area of Lapinlahti, Finland in 2005. The sample  
106 described here was collected as a part of a 5-year follow-up of the study in 2010 (n = 326) but  
107 only participants with alcohol use data (n = 289). Further exclusion criteria were a) Beck  
108 Depression Inventory (BDI) score of  $\geq 10$  at the time of the study or 5 years earlier (Beck,  
109 1961), or b) use of medication for depression. After exclusions, a total of 247 subjects were  
110 included in the study (Table 1).

111

112 The MDD cohort consisted of 99 outpatients with MDD who were recruited from the  
113 Department of Psychiatry of Kuopio University Hospital, Finland. The diagnosis of MDD  
114 was confirmed with the structured clinical interview for DSM-IV (SCID) (DSM-IV;  
115 American Psychiatric Association, 1994). The exclusion criteria were a) bipolar disorder, b)  
116 psychotic disorders, c) a symptomology of mental illness due to alcohol or substance abuse-  
117 related diagnosis, d) epilepsy, and e) current somatic conditions preventing participation in

118 the study visits. Most of the participants in the MDD cohort were being administered some  
119 form of psychotropic medication: 81 had been prescribed with an antidepressant medication  
120 and 48 with an antipsychotic drug with some indication other than a psychotic disease (the  
121 medication use has been described in detail in Ali-Sisto, et al. 2016).

122

### 123 *Alcohol use*

124 The participants in both cohorts completed self-report questionnaires from which the weekly  
125 alcohol use was extracted. Response alternatives were: < 1 drink/week, 1-2 drink(s)/week, 3-  
126 5 drinks/week, 6-9 drinks/week, 10-14 drinks/week, 15-21 drinks/week, 22-28 drinks/week,  
127 or > 28 drinks/week. One standard drink in Finland is defined as a drink containing 12 grams  
128 of ethanol. Values higher than 21 drinks per week were considered heavy use, between 6 and  
129 21 drinks per week moderate use, and below 6 drinks per week light drinking.

130

### 131 *Background data, depressive symptoms and psychiatric medications*

132 Background data was collected from the questionnaires completed by the participants.  
133 Depressive symptoms were assessed with the Beck Depression Inventory (Beck, 1961) in  
134 both cohorts. The use of prescription and over-the-counter medications was also recorded  
135 with a questionnaire and confirmed from the prescription documents that the participants  
136 provided. The following variables were also collected from both cohorts: age (in years),  
137 gender (female/male), regular smoking (yes/no), cohabitation status (married or living with a  
138 partner vs. living alone), and education level (higher education yes/no). Use of vegetables and  
139 use of fruits (< 1 time/week, 1-5 times/week, > 5 times/week, according to Savolainen et al.  
140 2014), and body mass index (BMI) were only available in the GP cohort.

141

142 *Metabolite profiling analysis*

143 Venous blood samples were obtained via venipuncture by trained laboratory personnel and  
144 centrifuged to separate the serum. Before venipuncture, the participants were instructed to  
145 fast for 12 hours. Serum samples were stored frozen at -80 °C until analyzed. The samples  
146 were analyzed in the metabolomics unit of the Institute of Molecular Medicine Finland  
147 (FIMM) in Helsinki, Finland. Metabolite profiling analysis of the samples was performed  
148 using liquid chromatography-mass spectrometry. Briefly, 10 µL of labeled internal standard  
149 mixture was added to the 100 µL of samples, and the samples were allowed to equilibrate  
150 with the internal standards. A total of 400 µL of extraction solvent (1% formic acid in  
151 acetonitrile) was added and the collected supernatant was dispensed into an Ostro™ 96-well  
152 plate (Waters Corporation, Milford, USA) and then filtered by applying a vacuum at a delta  
153 pressure of 300–400 mbar for 2.5 minutes on a Hamilton robot's vacuum station. After this, 5  
154 µL of filtered sample extract was injected into an Acquity UPLC system coupled to a Xevo®  
155 TQ-S triple quadrupole mass spectrometer (Waters Corporation, Milford, MA, USA), which  
156 was operated in both positive and negative polarities with a polarity switching time of 20  
157 msec for metabolite separation and quantification. The Multiple Reaction Monitoring (MRM)  
158 acquisition mode was selected for the quantification of the metabolites. MassLynx 4.1  
159 software was used for data acquisition, data handling, and instrument control. The data were  
160 processed using TargetLynx software.

161

162 *Statistics*

163 In the comparison of the background characteristics of the cohorts, we used Mann-Whitney U  
164 test for continuous and  $\chi^2$  test for binomial variables.



165

166 For the metabolite profiling data, only metabolites that were above the quantification limits in  
167 at least 50% of subjects in at least one cohort were included in the study. Metabolite  
168 concentrations below the quantification limit were excluded from the analysis, with the  
169 exception of cotinine, where concentrations below the quantification limit were considered to  
170 be zero.

171

172 In the statistical analysis of the metabolite data, the self-reported weekly alcohol drinking  
173 levels were coded numerically (1 = < 1 drink/week, 2 = 1–2 drink(s)/week, 3 = 3–5  
174 drinks/week, 4 = 6–9 drinks/week, 5 = 10–14 drinks/week, 6 = 15–21 drinks/week, 7 = 22–28  
175 drinks/week, and 8 = > 28 drinks/week) to allow us to conduct a regression analysis. We  
176 analyzed the two cohorts separately for changes in the metabolite concentrations associated  
177 with alcohol use. This was done to focus the analysis on alcohol use related changes, not to  
178 changes associated with MDD, which have been reported earlier (Ali-Sisto et al. 2016). We  
179 used linear regression to investigate correlations between self-reported weekly alcohol  
180 drinking and serum metabolite concentrations. To account for multiple testing, we undertook  
181 a principal component analysis and used the number of principal components needed to  
182 explain 95% of variance in the datasets to adjust the  $\alpha$ -level using Bonferroni's method to  
183 0.001 (46 and 41 principal components were needed to explain 95% of variance in the GP  
184 and MDD cohorts, respectively). Metabolites with p-values between 0.05 and 0.001 were  
185 considered as trends.

186

187 For metabolites with a p-value below 0.05 in the initial analysis, we conducted a post-hoc  
188 analysis using linear regression with possible confounders previously associated with alcohol

189 use and/or metabolite levels (age, sex, use of vegetables, use of fruits, smoking, BMI,  
190 education level, and cohabitation status) as covariates. We used JASP (version 0.14), SIMCA  
191 (version 17, Umetrics), and Prism (GraphPad Software Inc., version 7) for statistical  
192 analyses, multivariate analysis, and figure preparation, respectively.

193 **Results**

194 The characteristics of the study participants in both cohorts are presented in Table 1. The GP  
195 cohort was older than the MDD cohort. With respect to the selection criteria, as would be  
196 expected, the MDD cohort had higher BDI scores when compared to the non-depressed GP  
197 cohort. Subjects in the MDD cohort were living alone and smoked regularly more often when  
198 compared to the GP cohort.

199

200 The correlations found between self-reported alcohol use and serum metabolite  
201 concentrations with p-value below 0.05 in at least one cohort are shown in Figure 1.  
202 However, at the multiple testing adjusted  $\alpha$  level of 0.001, the only significant correlations  
203 were observed between self-reported alcohol use and serum concentrations of hippuric acid  
204 and chenodeoxycholic acid in the GP cohort, and xanthosine in the MDD cohort (Figure 1).  
205 Correlations with p-values between 0.05 and 0.001 should be considered as trends that need  
206 to be validated in larger cohorts. The correlations between self-reported alcohol use and all  
207 86 measured metabolites are shown in the Supplementary Table 1.

208

209 A post-hoc analysis was conducted using linear regression with potential confounders. In the  
210 GP cohort, most of the correlations between self-reported alcohol use and metabolite levels  
211 remained significant after taking into account possible confounders (hippuric acid  $\beta = -0.19$ ,  
212  $p = 0.0037$ ; chenodeoxycholic acid  $\beta = 0.19$ ,  $p = 0.0049$ ; cytidine  $\beta = 0.22$ ,  $p = 0.0011$ ; 5-  
213 HIAA  $\beta = -0.16$ ,  $p = 0.0183$ ; taurocholic acid  $\beta = 0.22$ ,  $p = 0.0012$ ; glutamine  $\beta = -0.20$ ,  $p =$   
214  $0.0040$ ; and serine  $\beta = -0.16$ ,  $p = 0.0218$ ). There were two exceptions; glycine ( $\beta = -0.12$ ,  $p =$   
215  $0.0785$ ) and cotinine ( $\beta = 0.03$ ,  $p = 0.5005$ ). Instead of alcohol use, sex correlated more with  
216 the glycine concentration ( $\beta = -0.15$  and  $p = 0.0382$ ) and smoking status more with cotinine

217 concentrations ( $\beta = 0.74$ ,  $p < 0.0001$ ). In the MDD cohort, all metabolites with a p-value  
218 below 0.05 in the initial analysis also had a p-value below 0.05 in the linear regression  
219 models when lifestyle factors were included as covariates (xanthosine  $\beta = -0.38$ ,  $p = 0.0002$ ;  
220 GABA  $\beta = 0.25$ ,  $p = 0.0186$ ; cytidine  $\beta = 0.21$ ,  $p = 0.0388$ ; carnosine  $\beta = -0.21$ ,  $p = 0.0348$ ;  
221 and 2-aminoisobutyric acid  $\beta = 0.22$ ,  $p = 0.0336$ ).

## 222 Discussion

223 Our main finding was that in the GP cohort, at least moderately increased alcohol use was  
224 associated with lower serum concentrations of hippuric acid. The hippuric acid  
225 concentrations in those individuals who reported six or more alcohol doses per week were  
226 similar to the concentrations observed in the MDD cohort regardless of their level of alcohol  
227 use (Figure 1). These results are in line with previous reports, where decreased levels of  
228 hippuric acid have been associated with alcohol use, depression, anxiety disorders, and stress  
229 (J. Chen et al., 2018; Kärkkäinen et al., 2020; Phua et al., 2015; P. Zheng, Wang, et al., 2013;  
230 P. Zheng, Chen, et al., 2013). Although rather little is known to explain how hippuric acid  
231 might influence behavior, previous studies have found that low hippuric acid levels may  
232 impair neuronal development in fetal mouse brain (Ahmed et al., 2022; Vuong et al., 2020).  
233 Moreover, in humans, low serum hippuric acid concentrations have been associated with mild  
234 cognitive impairment, whereas high levels of hippuric acid have been linked with beneficial  
235 effects on cognitive performance (Rutledge et al., 2021; Yilmaz et al., 2020).

236

237 In the GP cohort, similar trends were also seen in the association between self-reported  
238 alcohol use and concentrations of 5-HIAA and histidine. Interestingly, the composition of gut  
239 microbiota may influence the serum levels of the following three compounds, i.e., hippuric  
240 acid (Behr et al., 2017; Fujisaka et al., 2018; Lees et al., 2013; Pessa-Morikawa et al., 2022;  
241 Vuong et al., 2020; Williams et al., 2010), 5-HIAA (Lukić et al., 2019), and histidine (H.  
242 Chen et al., 2019; Kawase et al., 2017). Moreover, both alcohol use and MDD have been  
243 associated with an altered composition and changes in the function of the gut microbiota  
244 (Kelly et al., 2016; Leclercq et al., 2014; Llopis et al., 2016; Winter et al., 2018; P. Zheng et

245 al., 2016). Therefore, alterations in the gut microbiota could explain the correlations between  
246 serum levels of these metabolites, alcohol use and depression.

247

248 However, in the case of hippuric acid, the gut microbiota first makes benzoic acid from  
249 phenolic compounds in the diet, and then the liver forms hippuric acid by combining benzoic  
250 acid with glycine (Lees et al., 2013). The declines in serum hippuric acid concentrations  
251 could therefore also be a reflection of disturbed liver function since decreased hippuric acid  
252 production has been associated with alcohol use and impaired liver function (van Sumere et  
253 al., 1969). Furthermore, the intake of vegetables or fruits, the main sources of phenolic  
254 compounds in the diet, did not significantly correlate with serum hippuric acid concentrations  
255 in the present study. Therefore, differences in the intakes of food items with phenolic  
256 compounds are not a likely explanation for the changes we observed in serum levels of  
257 hippuric acid. More research is needed to clarify the role of hippuric acid in alcohol use and  
258 depression.

259

260 Moreover, we also observed a positive correlation between self-reported alcohol consumption  
261 and serum concentrations of two bile acids, chenodeoxycholic acid and taurocholic acid.  
262 These correlations could be associated with altered bile acid synthesis or metabolism, which  
263 can also be linked with the gut microbiota (Bajaj, 2019). Increases in serum levels of bile  
264 acids have been associated with the organ damage induced by alcohol consumption (Bajaj,  
265 2019; Milstein et al., 1976; Trinchet et al., 1994). Interestingly, there was no correlation  
266 between self-reported alcohol use and chenodeoxycholic acid levels in the MDD cohort,  
267 which could be associated with altered cholesterol metabolism in MDD since cholesterol is a  
268 starting precursor for bile acid formation (Kraav et al., 2019; Lehto et al., 2010). Moreover,

269 in the MDD cohort, we observed a negative correlation between xanthosine and self-reported  
270 alcohol use, which was not observed in the GP cohort. This difference is likely linked to the  
271 previously reported dysregulation of purine metabolism in the same cohort (Ali-Sisto et al.,  
272 2016).

273

274 Furthermore, there were several metabolites, which were positively (cytidine, taurocholic  
275 acid) or negatively (glycine, serine and glutamine) correlated with self-reported alcohol use  
276 in both the GP and MDD cohorts with similar standardized  $\beta$  coefficients (Figure 1).

277 However, due to the smaller sample size, these correlations were not statistically significant  
278 in the MDD cohort. These alterations are in line with results from previous studies

279 investigating changes associated with alcohol use in the human circulating metabolome

280 (Kärkkäinen et al., 2020; Lehikoinen et al., 2018; Voutilainen & Kärkkäinen, 2019; Würtz et  
281 al., 2016).

282

283 Limitations of the study include the relatively small number of subjects in the MDD cohort.

284 Based on the present results, moderate alcohol use seems to be associated with small-to-

285 medium effect size changes in the serum metabolite profile and therefore future studies

286 should examine larger cohorts. We estimated that a sample size of 315 would be needed to

287 observe small-to-medium effect size ( $f^2 > 0.1$ ) correlations between alcohol use and

288 metabolite concentrations with the corrected  $\alpha$  level used in the present study (0.0001) with

289 0.95 statistical power. Furthermore, future studies should also use other biomarkers such as

290 phosphatidylethanol, to assess recent alcohol use instead of relying solely on self-reporting

291 (Y. Zheng et al., 2011).

292

293 The present results show that already moderate alcohol use is associated with depression-like  
294 changes in the serum levels of a metabolite, hippuric acid, which has been linked with both  
295 the gut microbiota and liver function. This indicates that changes in the metabolites  
296 associated with the gut microbiota and liver function could be one of the molecular level  
297 links between alcohol use and depression, although further research will be needed to verify  
298 this hypothesis.



299 **Funding source**

300 This work was supported by The Finnish Foundation for Alcohol Studies (OK), and the  
301 Finnish Medical Foundation (SML).

302

303 **Declaration of competing interest**

304 OK is a co-founder of Afekta Technologies Ltd., company providing metabolomics analysis  
305 services (not used in the present study). All other authors have no conflicts of interest to  
306 declare.

307

308 **Acknowledgements**

309 The authors wish to thank Dr. Jorma Savolainen for his significant contribution in the  
310 collection of the Lapinlahti Study sample, and Dr. Ewen MacDonald for proofreading.

311

312 **Data availability statement**

313 The data that support the findings of this study are available on request from the  
314 corresponding author, OK. The data are not publicly available due to their containing  
315 information that could compromise the privacy of research participants. The study plan  
316 approved by the ethical committee and the participant consent terms preclude public sharing  
317 of these sensitive data, even in anonymized form.

## 318 **References**

- 319 Ahmed, H., Leyrolle, Q., Koistinen, V., Kärkkäinen, O., Layé, S., Delzenne, N., & Hanhineva, K. (2022).  
320 Microbiota-derived metabolites as drivers of gut-brain communication. *Gut Microbes*, *14*(1),  
321 2102878. <https://doi.org/10.1080/19490976.2022.2102878>
- 322 Ali-Sisto, T., Tolmunen, T., Toffol, E., Viinamäki, H., Mäntyselkä, P., Valkonen-Korhonen, M.,  
323 Honkalampi, K., Ruusunen, A., Velagapudi, V., & Lehto, S. M. (2016). Purine metabolism is  
324 dysregulated in patients with major depressive disorder. *Psychoneuroendocrinology*, *70*, 25–  
325 32. <https://doi.org/10.1016/j.psyneuen.2016.04.017>
- 326 Bajaj, J. S. (2019). Alcohol, liver disease and the gut microbiota. *Nature Reviews. Gastroenterology &*  
327 *Hepatology*, *16*(4), 235–246. <https://doi.org/10.1038/s41575-018-0099-1>
- 328 Beck, A. T. (1961). An Inventory for Measuring Depression. *Archives of General Psychiatry*, *4*(6), 561.  
329 <https://doi.org/10.1001/archpsyc.1961.01710120031004>
- 330 Behr, C., Kamp, H., Fabian, E., Krennrich, G., Mellert, W., Peter, E., Strauss, V., Walk, T., Rietjens, I. M.  
331 C. M., & van Ravenzwaay, B. (2017). Gut microbiome-related metabolic changes in plasma of  
332 antibiotic-treated rats. *Archives of Toxicology*, *91*(10), 3439–3454.  
333 <https://doi.org/10.1007/s00204-017-1949-2>
- 334 Bellos, S., Skapinakis, P., Rai, D., Zitko, P., Araya, R., Lewis, G., Lionis, C., & Mavreas, V. (2016).  
335 Longitudinal association between different levels of alcohol consumption and a new onset of  
336 depression and generalized anxiety disorder: Results from an international study in primary  
337 care. *Psychiatry Research*, *243*, 30–34. <https://doi.org/10.1016/j.psychres.2016.05.049>
- 338 Chen, H., Nwe, P.-K., Yang, Y., Rosen, C. E., Bielecka, A. A., Kuchroo, M., Cline, G. W., Kruse, A. C.,  
339 Ring, A. M., Crawford, J. M., & Palm, N. W. (2019). A Forward Chemical Genetic Screen  
340 Reveals Gut Microbiota Metabolites That Modulate Host Physiology. *Cell*, *177*(5), 1217-  
341 1231.e18. <https://doi.org/10.1016/j.cell.2019.03.036>

- 342 Chen, J., Bai, S.-J., Li, W., Zhou, C., Zheng, P., Fang, L., Wang, H., Liu, Y., & Xie, P. (2018). Urinary  
343 biomarker panel for diagnosing patients with depression and anxiety disorders. *Translational*  
344 *Psychiatry*, 8(1), 192. <https://doi.org/10.1038/s41398-018-0245-0>
- 345 DeVido, J. J., & Weiss, R. D. (2012). Treatment of the depressed alcoholic patient. *Current Psychiatry*  
346 *Reports*, 14(6), 610–618. <https://doi.org/10.1007/s11920-012-0314-7>
- 347 Fujisaka, S., Avila-Pacheco, J., Soto, M., Kostic, A., Dreyfuss, J. M., Pan, H., Ussar, S., Altindis, E., Li, N.,  
348 Bry, L., Clish, C. B., & Kahn, C. R. (2018). Diet, Genetics, and the Gut Microbiome Drive  
349 Dynamic Changes in Plasma Metabolites. *Cell Reports*, 22(11), 3072–3086.  
350 <https://doi.org/10.1016/j.celrep.2018.02.060>
- 351 Gadad, B. S., Jha, M. K., Czysz, A., Furman, J. L., Mayes, T. L., Emslie, M. P., & Trivedi, M. H. (2018).  
352 Peripheral biomarkers of major depression and antidepressant treatment response: Current  
353 knowledge and future outlooks. *Journal of Affective Disorders*, 233, 3–14.  
354 <https://doi.org/10.1016/j.jad.2017.07.001>
- 355 García-Esquinas, E., Ortola, R., Galán, I., Soler-Vila, H., Laclaustra, M., & Rodríguez-Artalejo, F. (2018).  
356 Moderate alcohol drinking is not associated with risk of depression in older adults. *Scientific*  
357 *Reports*, 8(1), 11512. <https://doi.org/10.1038/s41598-018-29985-4>
- 358 Grant, B. F., Goldstein, R. B., Saha, T. D., Chou, S. P., Jung, J., Zhang, H., Pickering, R. P., Ruan, W. J.,  
359 Smith, S. M., Huang, B., & Hasin, D. S. (2015). Epidemiology of DSM-5 Alcohol Use Disorder:  
360 Results From the National Epidemiologic Survey on Alcohol and Related Conditions III. *JAMA*  
361 *Psychiatry*, 72(8), 757. <https://doi.org/10.1001/jamapsychiatry.2015.0584>
- 362 Heikkinen, N., Kärkkäinen, O., Laukkanen, E., Kekkonen, V., Kaarre, O., Kivimäki, P., Könönen, M.,  
363 Velagapudi, V., Nandania, J., Lehto, S. M., Niskanen, E., Vanninen, R., & Tolmunen, T. (2019).  
364 Changes in the serum metabolite profile correlate with decreased brain gray matter volume  
365 in moderate-to-heavy drinking young adults. *Alcohol*, 75, 89–97.  
366 <https://doi.org/10.1016/j.alcohol.2018.05.010>

- 367 Jaremek, M., Yu, Z., Mangino, M., Mittelstrass, K., Prehn, C., Singmann, P., Xu, T., Dahmen, N.,  
368 Weinberger, K. M., Suhre, K., Peters, A., Döring, A., Hauner, H., Adamski, J., Illig, T., Spector,  
369 T. D., & Wang-Sattler, R. (2013). Alcohol-induced metabolomic differences in humans.  
370 *Translational Psychiatry*, 3(7), e276–e276. <https://doi.org/10.1038/tp.2013.55>
- 371 Kärkkäinen, O., Farokhnia, M., Klåvus, A., Auriola, S., Lehtonen, M., Deschaine, S. L., Piacentino, D.,  
372 Abshire, K. M., Jackson, S. N., & Leggio, L. (2021). Effect of intravenous ghrelin  
373 administration, combined with alcohol, on circulating metabolome in heavy drinking  
374 individuals with alcohol use disorder. *Alcoholism, Clinical and Experimental Research*, 45(11),  
375 Article 11. <https://doi.org/10.1111/acer.14719>
- 376 Kärkkäinen, O., Klåvus, A., Voutilainen, A., Virtanen, J., Lehtonen, M., Auriola, S., Kauhanen, J., &  
377 Rysä, J. (2020). Changes in circulating metabolome precede alcohol-related diseases in  
378 middle-aged men: A prospective population-based study with a 30-year follow-up.  
379 *Alcoholism: Clinical and Experimental Research*, 44, 2457–2467.  
380 <https://doi.org/10.1111/acer.14485>
- 381 Kärkkäinen, O., Kokla, M., Lehtonen, M., Auriola, S., Martiskainen, M., Tiihonen, J., Karhunen, P. J.,  
382 Hanhineva, K., & Kok, E. (2021). Changes in the metabolic profile of human male  
383 postmortem frontal cortex and cerebrospinal fluid samples associated with heavy alcohol  
384 use. *Addiction Biology*, e13035. <https://doi.org/10.1111/adb.13035>
- 385 Kawase, T., Nagasawa, M., Ikeda, H., Yasuo, S., Koga, Y., & Furuse, M. (2017). Gut microbiota of mice  
386 putatively modifies amino acid metabolism in the host brain. *British Journal of Nutrition*,  
387 117(6), 775–783. <https://doi.org/10.1017/S0007114517000678>
- 388 Kelly, J. R., Borre, Y., O' Brien, C., Patterson, E., El Aidy, S., Deane, J., Kennedy, P. J., Beers, S., Scott,  
389 K., Moloney, G., Hoban, A. E., Scott, L., Fitzgerald, P., Ross, P., Stanton, C., Clarke, G., Cryan,  
390 J. F., & Dinan, T. G. (2016). Transferring the blues: Depression-associated gut microbiota  
391 induces neurobehavioural changes in the rat. *Journal of Psychiatric Research*, 82, 109–118.  
392 <https://doi.org/10.1016/j.jpsychires.2016.07.019>

- 393 Kraav, S.-L., Tolmunen, T., Kärkkäinen, O., Ruusunen, A., Viinamäki, H., Mäntyselkä, P., Koivumaa-  
394 Honkanen, H., Valkonen-Korhonen, M., Honkalampi, K., Herzig, K.-H., & Lehto, S. M. (2019).  
395 Decreased serum total cholesterol is associated with a history of childhood physical violence  
396 in depressed outpatients. *Psychiatry Research*, *272*, 326–333.  
397 <https://doi.org/10.1016/j.psychres.2018.12.108>
- 398 Leclercq, S., Matamoros, S., Cani, P. D., Neyrinck, A. M., Jamar, F., Stärkel, P., Windey, K., Tremaroli,  
399 V., Bäckhed, F., Verbeke, K., de Timary, P., & Delzenne, N. M. (2014). Intestinal permeability,  
400 gut-bacterial dysbiosis, and behavioral markers of alcohol-dependence severity. *Proceedings*  
401 *of the National Academy of Sciences*, *111*(42), E4485–E4493.  
402 <https://doi.org/10.1073/pnas.1415174111>
- 403 Lees, H. J., Swann, J. R., Wilson, I. D., Nicholson, J. K., & Holmes, E. (2013). Hippurate: The Natural  
404 History of a Mammalian–Microbial Cometabolite. *Journal of Proteome Research*, *12*(4),  
405 1527–1546. <https://doi.org/10.1021/pr300900b>
- 406 Lehtikoinen, A. I., Kärkkäinen, O. K., Lehtonen, M. A. S., Auriola, S. O. K., Hanhineva, K. J., & Heinonen,  
407 S. T. (2018). Alcohol and substance use are associated with altered metabolome in the first  
408 trimester serum samples of pregnant mothers. *European Journal of Obstetrics & Gynecology*  
409 *and Reproductive Biology*, *223*, 79–84. <https://doi.org/10.1016/j.ejogrb.2018.02.004>
- 410 Lehto, S. M., Niskanen, L., Tolmunen, T., Hintikka, J., Viinamäki, H., Heiskanen, T., Honkalampi, K.,  
411 Kokkonen, M., & Koivumaa-Honkanen, H. (2010). Low serum HDL-cholesterol levels are  
412 associated with long symptom duration in patients with major depressive disorder: HDL-C  
413 and the duration of depression. *Psychiatry and Clinical Neurosciences*, *64*(3), 279–283.  
414 <https://doi.org/10.1111/j.1440-1819.2010.02079.x>
- 415 Llopis, M., Cassard, A. M., Wrzosek, L., Boschat, L., Bruneau, A., Ferrere, G., Puchois, V., Martin, J. C.,  
416 Lepage, P., Le Roy, T., Lefèvre, L., Langelier, B., Cailleux, F., González-Castro, A. M., Rabot, S.,  
417 Gaudin, F., Agostini, H., Prévot, S., Berrebi, D., ... Perlemuter, G. (2016). Intestinal microbiota

- 418 contributes to individual susceptibility to alcoholic liver disease. *Gut*, 65(5), 830–839.
- 419 <https://doi.org/10.1136/gutjnl-2015-310585>
- 420 Lukić, I., Getselter, D., Koren, O., & Elliott, E. (2019). Role of Tryptophan in Microbiota-Induced  
421 Depressive-Like Behavior: Evidence From Tryptophan Depletion Study. *Frontiers in*  
422 *Behavioral Neuroscience*, 13, 123. <https://doi.org/10.3389/fnbeh.2019.00123>
- 423 McHugh, R. K., & Weiss, R. D. (2019). Alcohol Use Disorder and Depressive Disorders. *Alcohol*  
424 *Research : Current Reviews*, 40(1), arcr.v40.1.01. <https://doi.org/10.35946/arcr.v40.1.01>
- 425 Milstein, H. J., Bloomer, J. R., & Klatskin, G. (1976). Serum bile acids in alcoholic liver disease.  
426 Comparison with histological features of the disease. *The American Journal of Digestive*  
427 *Diseases*, 21(4), 281–285. <https://doi.org/10.1007/BF01071839>
- 428 Odlaug, B. L., Gual, A., DeCourcy, J., Perry, R., Pike, J., Heron, L., & Rehm, J. (2016). Alcohol  
429 Dependence, Co-occurring Conditions and Attributable Burden. *Alcohol and Alcoholism*,  
430 51(2), 201–209. <https://doi.org/10.1093/alcalc/agv088>
- 431 Pessa-Morikawa, T., Husso, A., Kärkkäinen, O., Koistinen, V., Hanhineva, K., Iivanainen, A., & Niku, M.  
432 (2022). Maternal microbiota-derived metabolic profile in fetal murine intestine, brain and  
433 placenta. *BMC Microbiology*, 22(1), 46. <https://doi.org/10.1186/s12866-022-02457-6>
- 434 Phua, L. C., Wilder-Smith, C. H., Tan, Y. M., Gopalakrishnan, T., Wong, R. K., Li, X., Kan, M. E., Lu, J.,  
435 Keshavarzian, A., & Chan, E. C. Y. (2015). Gastrointestinal Symptoms and Altered Intestinal  
436 Permeability Induced by Combat Training Are Associated with Distinct Metabotypic Changes.  
437 *Journal of Proteome Research*, 14(11), 4734–4742.  
438 <https://doi.org/10.1021/acs.jproteome.5b00603>
- 439 Rutledge, G. A., Sandhu, A. K., Miller, M. G., Edirisinghe, I., Burton-Freeman, B. B., & Shukitt-Hale, B.  
440 (2021). Blueberry phenolics are associated with cognitive enhancement in supplemented  
441 healthy older adults. *Food & Function*, 12(1), 107–118. <https://doi.org/10.1039/d0fo02125c>

- 442 Sullivan, L. E., Fiellin, D. A., & O'Connor, P. G. (2005). The prevalence and impact of alcohol problems  
443 in major depression: A systematic review. *The American Journal of Medicine*, *118*(4), 330–  
444 341. <https://doi.org/10.1016/j.amjmed.2005.01.007>
- 445 Swendsen, J. D., Merikangas, K. R., Canino, G. J., Kessler, R. C., Rubio-Stipec, M., & Angst, J. (1998).  
446 The comorbidity of alcoholism with anxiety and depressive disorders in four geographic  
447 communities. *Comprehensive Psychiatry*, *39*(4), 176–184. [https://doi.org/10.1016/s0010-](https://doi.org/10.1016/s0010-440x(98)90058-x)  
448 [440x\(98\)90058-x](https://doi.org/10.1016/s0010-440x(98)90058-x)
- 449 Trinchet, J. C., Gerhardt, M. F., Balkau, B., Munz, C., & Poupon, R. E. (1994). Serum bile acids and  
450 cholestasis in alcoholic hepatitis. Relationship with usual liver tests and histological features.  
451 *Journal of Hepatology*, *21*(2), 235–240. [https://doi.org/10.1016/s0168-8278\(05\)80401-5](https://doi.org/10.1016/s0168-8278(05)80401-5)
- 452 van Sumere, C. F., Teuchy, H., Pé, H., Verbeke, R., & Bekaert, J. (1969). Quantitative investigation on  
453 the hippuric acid formation in healthy and diseased individuals. *Clinica Chimica Acta*, *26*(1),  
454 85–88. [https://doi.org/10.1016/0009-8981\(69\)90289-7](https://doi.org/10.1016/0009-8981(69)90289-7)
- 455 Voutilainen, T., & Kärkkäinen, O. (2019). Changes in the Human Metabolome Associated With  
456 Alcohol Use: A Review. *Alcohol and Alcoholism*, *54*(3), 225–234.  
457 <https://doi.org/10.1093/alcalc/agz030>
- 458 Vuong, H. E., Pronovost, G. N., Williams, D. W., Coley, E. J. L., Siegler, E. L., Qiu, A., Kazantsev, M.,  
459 Wilson, C. J., Rendon, T., & Hsiao, E. Y. (2020). The maternal microbiome modulates fetal  
460 neurodevelopment in mice. *Nature*, *586*(7828), 281–286. [https://doi.org/10.1038/s41586-](https://doi.org/10.1038/s41586-020-2745-3)  
461 [020-2745-3](https://doi.org/10.1038/s41586-020-2745-3)
- 462 Williams, H. R., Cox, I. J., Walker, D. G., Cobbold, J. F., Taylor-Robinson, S. D., Marshall, S. E., &  
463 Orchard, T. R. (2010). Differences in gut microbial metabolism are responsible for reduced  
464 hippurate synthesis in Crohn's disease. *BMC Gastroenterology*, *10*(1), 108.  
465 <https://doi.org/10.1186/1471-230X-10-108>

- 466 Winter, G., Hart, R. A., Charlesworth, R. P. G., & Sharpley, C. F. (2018). Gut microbiome and  
467 depression: What we know and what we need to know. *Reviews in the Neurosciences*, 29(6),  
468 629–643. <https://doi.org/10.1515/revneuro-2017-0072>
- 469 Würtz, P., Cook, S., Wang, Q., Tiainen, M., Tynkkynen, T., Kangas, A. J., Soininen, P., Laitinen, J.,  
470 Viikari, J., Kähönen, M., Lehtimäki, T., Perola, M., Blankenberg, S., Zeller, T., Männistö, S.,  
471 Salomaa, V., Järvelin, M.-R., Raitakari, O. T., Ala-Korpela, M., & Leon, D. A. (2016). Metabolic  
472 profiling of alcohol consumption in 9778 young adults. *International Journal of*  
473 *Epidemiology*, 45(5), 1493–1506. <https://doi.org/10.1093/ije/dyw175>
- 474 Yilmaz, A., Ugur, Z., Bisgin, H., Akyol, S., Bahado-Singh, R., Wilson, G., Imam, K., Maddens, M. E., &  
475 Graham, S. F. (2020). Targeted Metabolic Profiling of Urine Highlights a Potential Biomarker  
476 Panel for the Diagnosis of Alzheimer’s Disease and Mild Cognitive Impairment: A Pilot Study.  
477 *Metabolites*, 10(9), E357. <https://doi.org/10.3390/metabo10090357>
- 478 Zheng, P., Chen, J., Huang, T., Wang, M., Wang, Y., Dong, M., Huang, Y., Zhou, L., & Xie, P. (2013). A  
479 Novel Urinary Metabolite Signature for Diagnosing Major Depressive Disorder. *Journal of*  
480 *Proteome Research*, 12(12), 5904–5911. <https://doi.org/10.1021/pr400939q>
- 481 Zheng, P., Wang, Y., Chen, L., Yang, D., Meng, H., Zhou, D., Zhong, J., Lei, Y., Melgiri, N. D., & Xie, P.  
482 (2013). Identification and validation of urinary metabolite biomarkers for major depressive  
483 disorder. *Molecular & Cellular Proteomics: MCP*, 12(1), 207–214.  
484 <https://doi.org/10.1074/mcp.M112.021816>
- 485 Zheng, P., Zeng, B., Zhou, C., Liu, M., Fang, Z., Xu, X., Zeng, L., Chen, J., Fan, S., Du, X., Zhang, X., Yang,  
486 D., Yang, Y., Meng, H., Li, W., Melgiri, N. D., Licinio, J., Wei, H., & Xie, P. (2016). Gut  
487 microbiome remodeling induces depressive-like behaviors through a pathway mediated by  
488 the host’s metabolism. *Molecular Psychiatry*, 21(6), 786–796.  
489 <https://doi.org/10.1038/mp.2016.44>
- 490 Zheng, Y., Beck, O., & Helander, A. (2011). Method development for routine liquid chromatography–  
491 mass spectrometry measurement of the alcohol biomarker phosphatidylethanol (PEth) in



492 blood. *Clinica Chimica Acta*, 412(15–16), 1428–1435.

493 <https://doi.org/10.1016/j.cca.2011.04.022>

494

495 Table 1: Background characteristics of the study cohorts.

| Variable                         | Cohort            |                    | test value         | p-value |
|----------------------------------|-------------------|--------------------|--------------------|---------|
|                                  | GP (n = 247)      | MDD (n=99)         |                    |         |
| Age (years, mean $\pm$ SD)       | 54.6 ( $\pm$ 9.5) | 39.4 ( $\pm$ 11.9) | 4213 <sup>b</sup>  | <0.0001 |
| Gender (% females)               | 118 (48 %)        | 56 (56%)           | 2 <sup>a</sup>     | 0.1393  |
| Living with a partner (n, %)     | 206 (83%)         | 52 (53%)           | 37 <sup>a</sup>    | <0.0001 |
| BDI score (mean $\pm$ SD)        | 3 ( $\pm$ 2)      | 28 ( $\pm$ 12)     | 22733 <sup>b</sup> | <0.0001 |
| Self-reported alcohol use (n, %) |                   |                    | 13 <sup>a</sup>    | 0.0742  |
| <b>Light alcohol use</b>         | <b>192 (78%)</b>  | <b>77 (78%)</b>    |                    |         |
| < 1 doses/week                   | 75 (30%)          | 34 (34%)           |                    |         |
| 1-2 doses/week                   | 59 (24%)          | 26 (26%)           |                    |         |
| 3-5 doses/week                   | 58 (23%)          | 17 (17%)           |                    |         |
| <b>Moderate alcohol use</b>      | <b>54 (22%)</b>   | <b>19 (19%)</b>    |                    |         |
| 6-9 doses/week                   | 26 (10%)          | 15 (15%)           |                    |         |
| 10-14 doses/week                 | 23 (9%)           | 2 (2%)             |                    |         |
| 15-21 doses/week                 | 5 (2%)            | 2 (2%)             |                    |         |
| <b>Heavy alcohol use</b>         | <b>1 (0.4%)</b>   | <b>3 (3%)</b>      |                    |         |
| 22-28 doses/week                 | 1 (0.4%)          | 2 (2%)             |                    |         |
| >28 doses/week                   | 0 (0%)            | 1 (2%)             |                    |         |
| Smoking (n, %)                   | 48 (19%)          | 33 (33%)           | 18 <sup>a</sup>    | <0.0001 |
| Antidepressant use (n, %)        | 0 (0%)            | 84 (85%)           | 277 <sup>a</sup>   | <0.0001 |
| BMI (mean $\pm$ SD)              | 28 ( $\pm$ 5)     | -                  |                    |         |
| Use of vegetables (n, %)         |                   |                    |                    |         |
| >5 times/week                    | 81 (32%)          | -                  |                    |         |
| 1-5 times/week                   | 85 (34%)          | -                  |                    |         |
| <1 times/week                    | 86 (34%)          | -                  |                    |         |
| Use of fruits (n, %)             |                   |                    |                    |         |
| >5 times/week                    | 95 (38%)          | -                  |                    |         |
| 1-5 times/week                   | 88 (35%)          | -                  |                    |         |
| <1 times/week                    | 69 (27%)          | -                  |                    |         |

496

497 Legend: GP, general population cohort; MDD, cohort of patients with a major depressive  
 498 disorder; BDI, Beck Depression Inventory; BMI, body mass index; SD, standard deviation;  
 499 significant difference between the study cohorts as evaluated by: <sup>a</sup> =  $\chi^2$  test, or <sup>b</sup> = Mann-  
 500 Whitney U test.

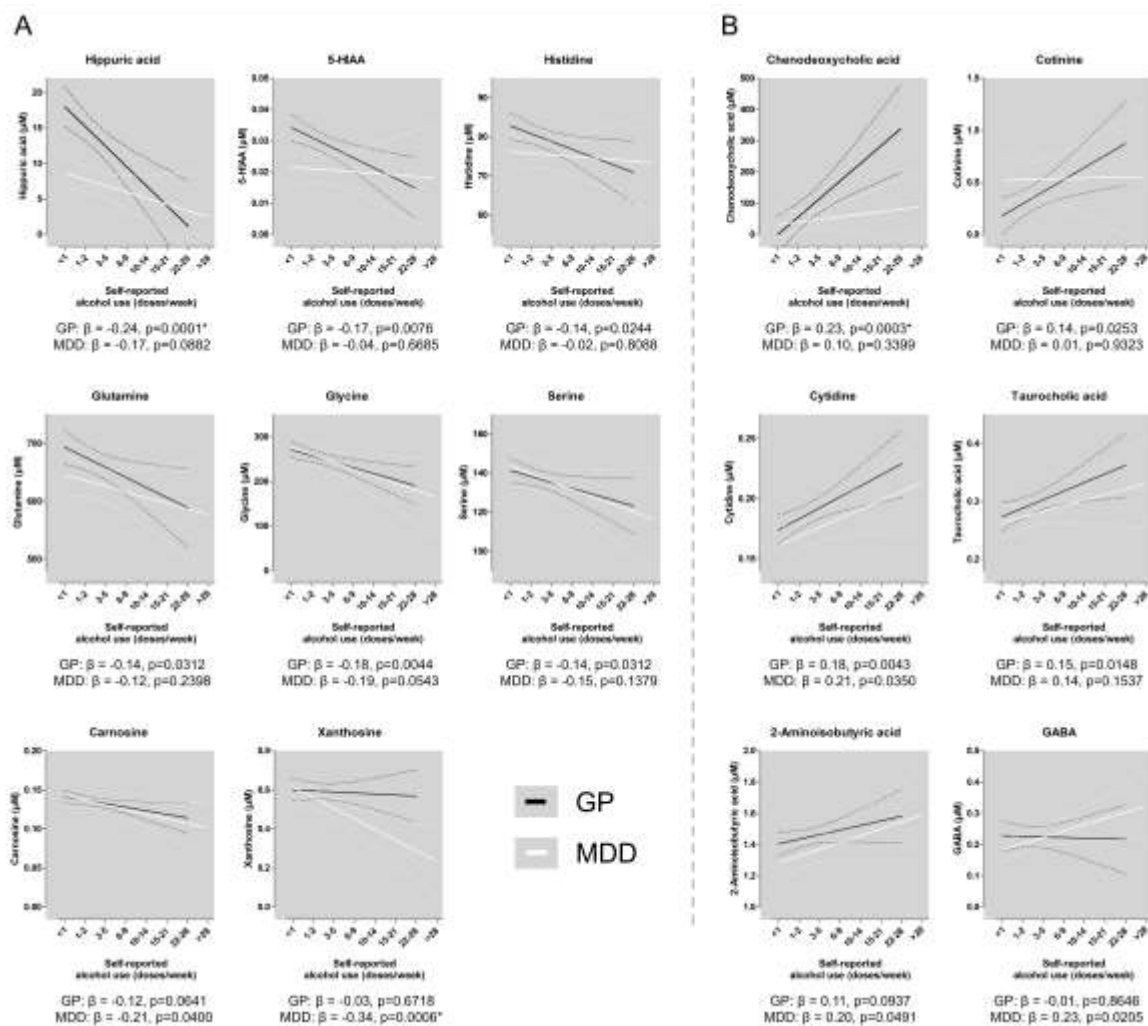

501

502 **Figure 1: Metabolites associated with self-reported alcohol use.** Standardized  $\beta$   
 503 coefficients are shown (with 95% confidence intervals as dashed lines) for linear regression  
 504 models between measured metabolites and self-reported alcohol use with negative (A) or  
 505 positive (B) correlations. After correction for multiple testing, only correlations between self-  
 506 reported alcohol use and chenodeoxycholic acid, hippuric acid and xanthosine can be viewed  
 507 as significant (p-values below multiple testing adjusted  $\alpha$  of 0.001). Other correlations should  
 508 be considered as trends. Legend: GP, general population cohort; MDD, major depressive  
 509 disorder cohort;  $\beta$ , standardized  $\beta$  coefficient from linear regression model; p, p-value from  
 510 linear regression model; \*, p-value < 0.001 (Bonferroni adjusted  $\alpha$  level).
